# Supplementary material for: ACSL1, CH25H, GPCPD1, and PLA2G12A as the potential lipid-related diagnostic biomarkers of acute myocardial infarction
Source: publisher site journal article supplement (doi:10.18632/aging.204542), 2023-02-24
Supplement: Supplementary file [file aging-v15i5-204542-supplementary-material-SD1.pdf]

## SUPPLEMENTARY FIGURE

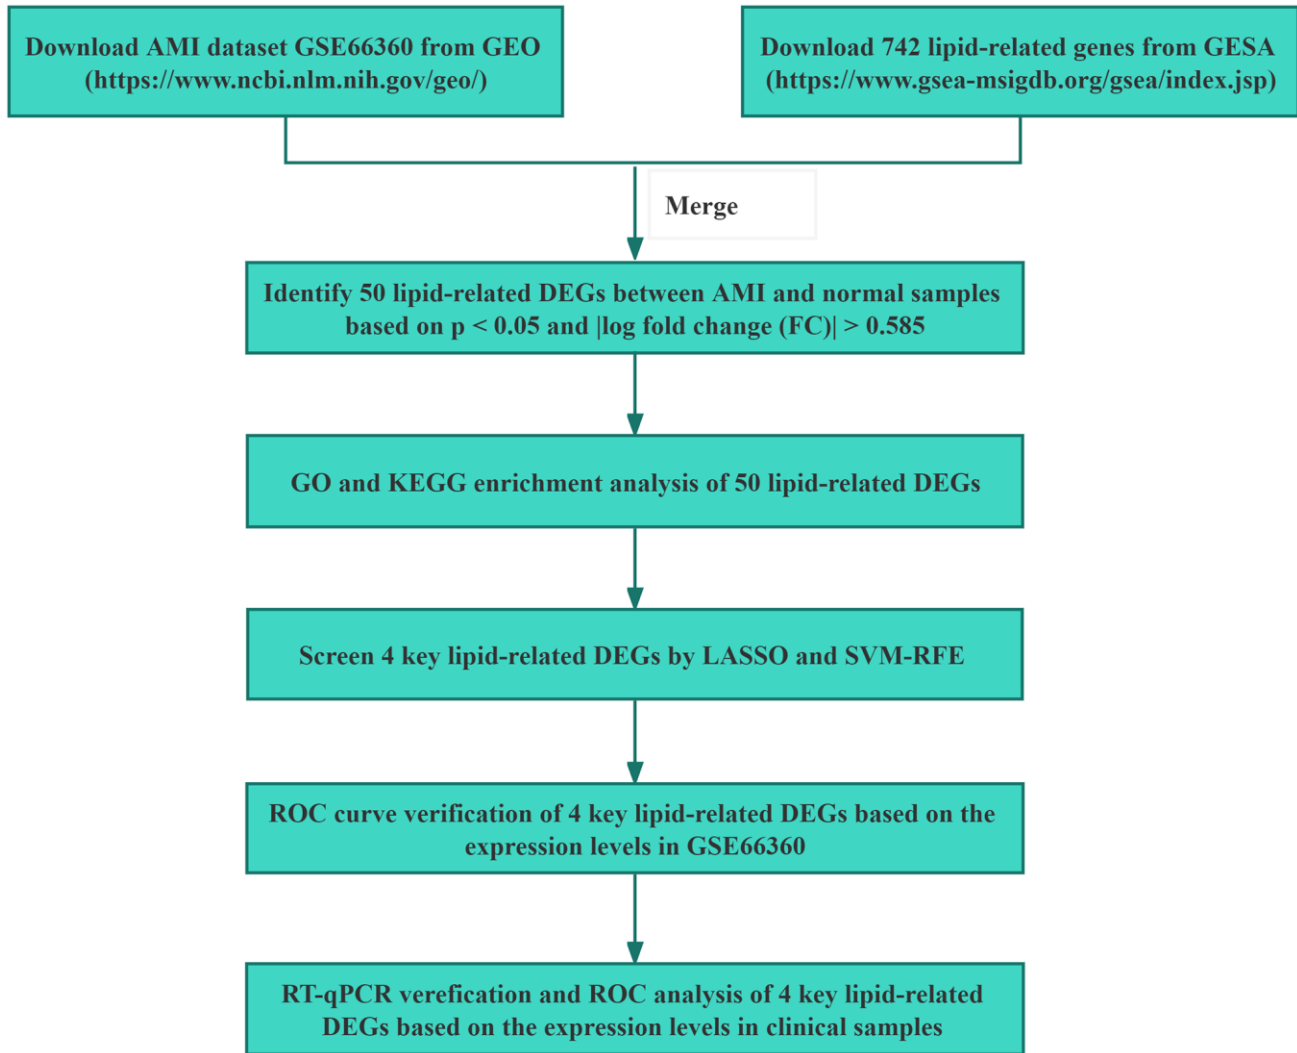

Supplementary Figure 1. A flow chart for analysis.
