# Supplementary material for: ACSL1, CH25H, GPCPD1, and PLA2G12A as the potential lipid-related diagnostic biomarkers of acute myocardial infarction
Source: publisher site journal article supplement (doi:10.18632/aging.204542), 2023-02-24
Supplement: Supplementary file [file aging-v15i5-204542-supplementary-material-SD3.pdf]

**Supplementary Table 2. Key genes identified by LASSO and SVM-RFE.**

| <b>Names</b>  | <b>Total</b> | <b>GENES</b>                                                                                                                                |
|---------------|--------------|---------------------------------------------------------------------------------------------------------------------------------------------|
| LASSO SVM-RFE | 4            | ACSL1<br>CH25H<br>PLA2G12A<br>GPCPD1                                                                                                        |
| LASSO         | 15           | ACSL1<br>CH25H<br>HSD11B1<br>CYP1B1<br>BMX<br>PLA2G12A<br>GPCPD1<br>CROT<br>ARV1<br>TBXAS1<br>GK3P<br>LCLAT1<br>ALOX5AP<br>ORMDL2<br>STARD4 |
| SVM-RFE       | 4            | GPCPD1<br>ACSL1<br>CH25H<br>PLA2G12A                                                                                                        |
