# Supplementary material for: ACSL1, CH25H, GPCPD1, and PLA2G12A as the potential lipid-related diagnostic biomarkers of acute myocardial infarction
Source: Aging (Albany NY). 2023 Feb 24;15(5):1394–411. doi: 10.18632/aging.204542 (PMC10042701; doi:10.18632/aging.204542)
Supplement: Supplementary Table 1 [file aging-15-204542-s002.xls]

## Sheet: Sheet1
Supplementary Table 1. Functional annotation of the DEGs.
Group	ID	Description	GeneRatio	BgRatio	pvalue	p.adjust	qvalue	geneID	Count
KEGG	hsa00590	Arachidonic acid metabolism	8/41	61/8142	4.87e-10	4.04e-08	3.23e-08	CYP4F3/CYP4F2/CYP2E1/PLA2G12A/TBXAS1/PTGS1/PTGS2/ALOX12	8
KEGG	hsa00564	Glycerophospholipid metabolism	8/41	98/8142	2.27e-08	9.43e-07	7.54e-07	MBOAT2/LPCAT2/MBOAT7/PLA2G12A/GPCPD1/AGPAT5/LCLAT1/CEPT1	8
KEGG	hsa00561	Glycerolipid metabolism	5/41	61/8142	1.22e-05	0.000336789	0.000269089	MBOAT2/DGAT2/AGPAT5/GK/LCLAT1	5
KEGG	hsa04975	Fat digestion and absorption	4/41	43/8142	5.93e-05	0.0012297	0.000982512	CD36/ABCA1/DGAT2/PLA2G12A	4
KEGG	hsa00565	Ether lipid metabolism	4/41	49/8142	9.95e-05	0.00165252	0.00132034	LPCAT2/PLA2G12A/GDPD3/CEPT1	4
KEGG	hsa05204	Chemical carcinogenesis - DNA adducts	4/41	69/8142	0.000377717	0.00522508	0.00417476	HSD11B1/CYP1B1/CYP2E1/PTGS2	4
KEGG	hsa03320	PPAR signaling pathway	4/41	75/8142	0.000519611	0.0061611	0.00492263	ACSL1/CD36/CYP27A1/GK	4
KEGG	hsa04979	Cholesterol metabolism	3/41	50/8142	0.00197134	0.0204527	0.0163414	CD36/ABCA1/CYP27A1	3
KEGG	hsa04923	Regulation of lipolysis in adipocytes	3/41	56/8142	0.00273038	0.0251802	0.0201186	ABHD5/PTGS1/PTGS2	3
KEGG	hsa00120	Primary bile acid biosynthesis	2/41	17/8142	0.00320759	0.026287	0.0210029	CH25H/CYP27A1	2
KEGG	hsa00140	Steroid hormone biosynthesis	3/41	61/8142	0.00348382	0.026287	0.0210029	HSD11B1/CYP1B1/CYP2E1	3
KEGG	hsa00980	Metabolism of xenobiotics by cytochrome P450	3/41	78/8142	0.00694179	0.0475431	0.0379862	HSD11B1/CYP1B1/CYP2E1	3
KEGG	hsa04146	Peroxisome	3/41	82/8142	0.0079696	0.0475431	0.0379862	ACSL1/CROT/PHYH	3
KEGG	hsa00062	Fatty acid elongation	2/41	27/8142	0.00801931	0.0475431	0.0379862	ELOVL4/THEM4	2
KEGG	hsa00591	Linoleic acid metabolism	2/41	29/8142	0.00921721	0.0510019	0.0407498	CYP2E1/PLA2G12A	2
BP	GO:0006631	fatty acid metabolic process	20/49	390/18723	2.37e-21	2.55e-18	1.71e-18	ACSL1/ABHD5/CD36/CYP1B1/CYP4F3/ELOVL4/DGAT2/CYP4F2/CYP2E1/CROT/THEM4/TBXAS1/ASAH1/PTGS1/PTGS2/ALOX5AP/MCEE/PHYH/ALOX12/INSIG2	20
BP	GO:0046486	glycerolipid metabolic process	18/49	392/18723	2.59e-18	1.39e-15	9.32e-16	ACSL1/ABHD5/MBOAT2/LPCAT2/DGAT2/BMX/MBOAT7/CYP2E1/GPCPD1/AGPAT5/GK/PIK3C2B/GDPD3/LCLAT1/CEPT1/SLC44A3/PNPLA4/INSIG2	18
BP	GO:0006644	phospholipid metabolic process	16/49	383/18723	1.25e-15	4.48e-13	2.99e-13	ABHD5/PLBD1/MBOAT2/LPCAT2/BMX/MBOAT7/PLA2G12A/GPCPD1/GGPS1/AGPAT5/PIK3C2B/GDPD3/SGMS2/LCLAT1/CEPT1/SLC44A3	16
BP	GO:0016042	lipid catabolic process	15/49	320/18723	2.09e-15	5.62e-13	3.76e-13	ABHD5/PLBD1/HSD11B1/CYP1B1/CYP4F3/CYP27A1/CYP4F2/PLA2G12A/GPCPD1/CROT/ASAH1/GDPD3/MCEE/PHYH/PNPLA4	15
BP	GO:0045017	glycerolipid biosynthetic process	12/49	252/18723	1.61e-12	3.04e-10	2.03e-10	ACSL1/ABHD5/LPCAT2/DGAT2/BMX/MBOAT7/AGPAT5/GK/PIK3C2B/LCLAT1/CEPT1/SLC44A3	12
BP	GO:0008654	phospholipid biosynthetic process	12/49	253/18723	1.69e-12	3.04e-10	2.03e-10	ABHD5/MBOAT2/LPCAT2/BMX/MBOAT7/GGPS1/AGPAT5/PIK3C2B/SGMS2/LCLAT1/CEPT1/SLC44A3	12
BP	GO:0019369	arachidonic acid metabolic process	8/49	59/18723	2.42e-12	3.72e-10	2.49e-10	CYP1B1/CYP4F3/CYP4F2/CYP2E1/TBXAS1/PTGS1/PTGS2/ALOX12	8
BP	GO:0120254	olefinic compound metabolic process	10/49	153/18723	6.17e-12	8.31e-10	5.56e-10	CYP1B1/CYP4F3/DGAT2/CYP4F2/CYP2E1/TBXAS1/PTGS1/PTGS2/PNPLA4/ALOX12	10
BP	GO:0001676	long-chain fatty acid metabolic process	9/49	112/18723	1.19e-11	1.42e-09	9.52e-10	ACSL1/CYP1B1/CYP4F3/CYP4F2/CYP2E1/TBXAS1/PTGS1/PTGS2/ALOX12	9
BP	GO:0006650	glycerophospholipid metabolic process	12/49	306/18723	1.57e-11	1.6e-09	1.07e-09	ABHD5/MBOAT2/LPCAT2/BMX/MBOAT7/GPCPD1/AGPAT5/PIK3C2B/GDPD3/LCLAT1/CEPT1/SLC44A3	12
BP	GO:0033559	unsaturated fatty acid metabolic process	9/49	116/18723	1.64e-11	1.6e-09	1.07e-09	CYP1B1/CYP4F3/ELOVL4/CYP4F2/CYP2E1/TBXAS1/PTGS1/PTGS2/ALOX12	9
BP	GO:0006690	icosanoid metabolic process	9/49	123/18723	2.79e-11	2.5e-09	1.67e-09	CYP1B1/CYP4F3/CYP4F2/CYP2E1/TBXAS1/PTGS1/PTGS2/ALOX5AP/ALOX12	9
BP	GO:0006639	acylglycerol metabolic process	9/49	128/18723	4e-11	3.3e-09	2.21e-09	ACSL1/ABHD5/DGAT2/MBOAT7/CYP2E1/AGPAT5/GK/PNPLA4/INSIG2	9
BP	GO:0006638	neutral lipid metabolic process	9/49	129/18723	4.3e-11	3.3e-09	2.21e-09	ACSL1/ABHD5/DGAT2/MBOAT7/CYP2E1/AGPAT5/GK/PNPLA4/INSIG2	9
BP	GO:0044242	cellular lipid catabolic process	10/49	214/18723	1.72e-10	1.23e-08	8.24e-09	ABHD5/PLBD1/CYP1B1/GPCPD1/CROT/ASAH1/GDPD3/MCEE/PHYH/PNPLA4	10
BP	GO:0006641	triglyceride metabolic process	8/49	100/18723	1.88e-10	1.26e-08	8.44e-09	ACSL1/ABHD5/DGAT2/MBOAT7/CYP2E1/GK/PNPLA4/INSIG2	8
BP	GO:0008202	steroid metabolic process	11/49	319/18723	4.84e-10	3.07e-08	2.05e-08	CH25H/ABCA1/HSD11B1/CYP1B1/DGAT2/CYP27A1/CYP2E1/ARV1/ASAH1/STARD4/INSIG2	11
BP	GO:0006066	alcohol metabolic process	11/49	353/18723	1.41e-09	8.42e-08	5.63e-08	CH25H/ABCA1/CYP1B1/DGAT2/CYP27A1/ARV1/ASAH1/GK/GDPD3/PNPLA4/INSIG2	11
BP	GO:0046474	glycerophospholipid biosynthetic process	9/49	211/18723	3.44e-09	1.95e-07	1.3e-07	ABHD5/LPCAT2/BMX/MBOAT7/AGPAT5/PIK3C2B/LCLAT1/CEPT1/SLC44A3	9
BP	GO:0072330	monocarboxylic acid biosynthetic process	9/49	214/18723	3.89e-09	2.09e-07	1.4e-07	ELOVL4/CYP27A1/CYP2E1/TBXAS1/PTGS1/PTGS2/STARD4/ALOX12/INSIG2	9
BP	GO:0046394	carboxylic acid biosynthetic process	10/49	314/18723	7.03e-09	3.6e-07	2.41e-07	ELOVL4/CYP27A1/CYP2E1/TBXAS1/PTGS1/PTGS2/ALOX5AP/STARD4/ALOX12/INSIG2	10
BP	GO:0016053	organic acid biosynthetic process	10/49	316/18723	7.47e-09	3.66e-07	2.44e-07	ELOVL4/CYP27A1/CYP2E1/TBXAS1/PTGS1/PTGS2/ALOX5AP/STARD4/ALOX12/INSIG2	10
BP	GO:0070542	response to fatty acid	6/49	64/18723	1.56e-08	7.32e-07	4.9e-07	ACSL1/CD36/DGAT2/TBXAS1/PTGS2/INSIG2	6
BP	GO:0046470	phosphatidylcholine metabolic process	6/49	74/18723	3.79e-08	1.63e-06	1.09e-06	MBOAT2/LPCAT2/MBOAT7/GDPD3/CEPT1/SLC44A3	6
BP	GO:1901568	fatty acid derivative metabolic process	6/49	74/18723	3.79e-08	1.63e-06	1.09e-06	ACSL1/CYP4F3/ELOVL4/DGAT2/CYP4F2/ALOX12	6
BP	GO:0030258	lipid modification	8/49	212/18723	7.17e-08	2.97e-06	1.98e-06	MBOAT2/DGAT2/MBOAT7/CYP2E1/CROT/PHYH/STARD4/ALOX12	8
BP	GO:0016125	sterol metabolic process	7/49	152/18723	1.31e-07	5.21e-06	3.48e-06	CH25H/ABCA1/CYP1B1/DGAT2/CYP27A1/ARV1/INSIG2	7
BP	GO:0019216	regulation of lipid metabolic process	9/49	331/18723	1.67e-07	6.42e-06	4.29e-06	ABHD5/DGAT2/MBOAT7/ARV1/ASAH1/PTGS2/ORMDL2/STARD4/INSIG2	9
BP	GO:0010876	lipid localization	10/49	448/18723	1.98e-07	7.37e-06	4.93e-06	ACSL1/ABHD5/CD36/ABCA1/DGAT2/CYP4F2/PLA2G12A/CROT/ARV1/STARD4	10
BP	GO:0006633	fatty acid biosynthetic process	7/49	163/18723	2.1e-07	7.42e-06	4.96e-06	ELOVL4/CYP2E1/TBXAS1/PTGS1/PTGS2/ALOX12/INSIG2	7
BP	GO:0006636	unsaturated fatty acid biosynthetic process	5/49	51/18723	2.14e-07	7.42e-06	4.96e-06	ELOVL4/TBXAS1/PTGS1/PTGS2/ALOX12	5
BP	GO:0006720	isoprenoid metabolic process	6/49	116/18723	5.59e-07	1.88e-05	1.26e-05	CYP1B1/DGAT2/CYP2E1/GGPS1/PHYH/PNPLA4	6
BP	GO:0008203	cholesterol metabolic process	6/49	137/18723	1.48e-06	4.85e-05	3.24e-05	CH25H/ABCA1/DGAT2/CYP27A1/ARV1/INSIG2	6
BP	GO:0006691	leukotriene metabolic process	4/49	35/18723	2.04e-06	6.47e-05	4.32e-05	CYP4F3/CYP4F2/ALOX5AP/ALOX12	4
BP	GO:1902652	secondary alcohol metabolic process	6/49	147/18723	2.24e-06	6.89e-05	4.61e-05	CH25H/ABCA1/DGAT2/CYP27A1/ARV1/INSIG2	6
BP	GO:1901617	organic hydroxy compound biosynthetic process	7/49	237/18723	2.6e-06	7.79e-05	5.21e-05	CH25H/CYP27A1/ARV1/ASAH1/STARD4/ALOX12/INSIG2	7
BP	GO:0015908	fatty acid transport	5/49	86/18723	2.96e-06	8.61e-05	5.75e-05	ACSL1/CD36/CYP4F2/PLA2G12A/CROT	5
BP	GO:0019915	lipid storage	5/49	87/18723	3.13e-06	8.87e-05	5.93e-05	ABHD5/CD36/ABCA1/DGAT2/STARD4	5
BP	GO:0006721	terpenoid metabolic process	5/49	97/18723	5.35e-06	0.000144558	9.66e-05	CYP1B1/DGAT2/CYP2E1/GGPS1/PNPLA4	5
BP	GO:0046890	regulation of lipid biosynthetic process	6/49	171/18723	5.37e-06	0.000144558	9.66e-05	DGAT2/ASAH1/PTGS2/ORMDL2/STARD4/INSIG2	6
BP	GO:0006694	steroid biosynthetic process	6/49	173/18723	5.74e-06	0.000150784	0.000100803	CH25H/CYP27A1/ARV1/ASAH1/STARD4/INSIG2	6
BP	GO:0036151	phosphatidylcholine acyl-chain remodeling	3/49	14/18723	6.01e-06	0.000154077	0.000103004	MBOAT2/LPCAT2/MBOAT7	3
BP	GO:0019218	regulation of steroid metabolic process	5/49	100/18723	6.22e-06	0.000155766	0.000104134	DGAT2/ARV1/ASAH1/STARD4/INSIG2	5
BP	GO:1905952	regulation of lipid localization	6/49	181/18723	7.44e-06	0.000182108	0.000121743	ACSL1/ABHD5/CD36/ABCA1/CYP4F2/ARV1	6
BP	GO:0006869	lipid transport	8/49	398/18723	8.18e-06	0.000195673	0.000130812	ACSL1/CD36/ABCA1/CYP4F2/PLA2G12A/CROT/ARV1/STARD4	8
BP	GO:0046456	icosanoid biosynthetic process	4/49	56/18723	1.38e-05	0.00032208	0.000215318	TBXAS1/PTGS1/PTGS2/ALOX5AP	4
BP	GO:0006643	membrane lipid metabolic process	6/49	203/18723	1.43e-05	0.000327883	0.000219198	CYP1B1/ELOVL4/ARV1/ASAH1/SGMS2/ORMDL2	6
BP	GO:0019373	epoxygenase P450 pathway	3/49	19/18723	1.58e-05	0.000355604	0.00023773	CYP1B1/CYP4F2/CYP2E1	3
BP	GO:0072329	monocarboxylic acid catabolic process	5/49	122/18723	1.64e-05	0.000360485	0.000240992	CYP4F3/CYP4F2/CROT/MCEE/PHYH	5
BP	GO:0042180	cellular ketone metabolic process	6/49	211/18723	1.78e-05	0.000383664	0.000256489	CYP4F3/DGAT2/CYP4F2/PTGS2/STARD4/INSIG2	6
BP	GO:0033865	nucleoside bisphosphate metabolic process	5/49	128/18723	2.07e-05	0.000420403	0.000281049	ACSL1/ELOVL4/DGAT2/CROT/MCEE	5
BP	GO:0033875	ribonucleoside bisphosphate metabolic process	5/49	128/18723	2.07e-05	0.000420403	0.000281049	ACSL1/ELOVL4/DGAT2/CROT/MCEE	5
BP	GO:0034032	purine nucleoside bisphosphate metabolic process	5/49	128/18723	2.07e-05	0.000420403	0.000281049	ACSL1/ELOVL4/DGAT2/CROT/MCEE	5
BP	GO:0010878	cholesterol storage	3/49	21/18723	2.17e-05	0.000432257	0.000288974	CD36/ABCA1/STARD4	3
BP	GO:0046503	glycerolipid catabolic process	4/49	65/18723	2.49e-05	0.000488041	0.000326267	ABHD5/GPCPD1/GDPD3/PNPLA4	4
BP	GO:0035336	long-chain fatty-acyl-CoA metabolic process	3/49	25/18723	3.72e-05	0.000715524	0.000478345	ACSL1/ELOVL4/DGAT2	3
BP	GO:1901616	organic hydroxy compound catabolic process	4/49	78/18723	5.12e-05	0.000945767	0.000632268	CYP4F3/CYP27A1/CYP4F2/GK	4
BP	GO:0044282	small molecule catabolic process	7/49	376/18723	5.18e-05	0.000945767	0.000632268	CYP4F3/CYP27A1/CYP4F2/CROT/GK/MCEE/PHYH	7
BP	GO:0006665	sphingolipid metabolic process	5/49	155/18723	5.18e-05	0.000945767	0.000632268	ELOVL4/ARV1/ASAH1/SGMS2/ORMDL2	5
BP	GO:0032366	intracellular sterol transport	3/49	29/18723	5.87e-05	0.00103592	0.000692535	ABCA1/ARV1/STARD4	3
BP	GO:0032367	intracellular cholesterol transport	3/49	29/18723	5.87e-05	0.00103592	0.000692535	ABCA1/ARV1/STARD4	3
BP	GO:0001516	prostaglandin biosynthetic process	3/49	31/18723	7.19e-05	0.00122935	0.000821851	TBXAS1/PTGS1/PTGS2	3
BP	GO:0046457	prostanoid biosynthetic process	3/49	31/18723	7.19e-05	0.00122935	0.000821851	TBXAS1/PTGS1/PTGS2	3
BP	GO:0055088	lipid homeostasis	5/49	167/18723	7.38e-05	0.00124232	0.00083052	ABHD5/ABCA1/DGAT2/ORMDL2/PNPLA4	5
BP	GO:0006654	phosphatidic acid biosynthetic process	3/49	33/18723	8.7e-05	0.00144095	0.000963311	ABHD5/AGPAT5/LCLAT1	3
BP	GO:0000038	very long-chain fatty acid metabolic process	3/49	34/18723	9.52e-05	0.00155359	0.00103861	ACSL1/ELOVL4/CYP4F2	3
BP	GO:0071466	cellular response to xenobiotic stimulus	5/49	177/18723	9.72e-05	0.00156178	0.00104409	ACSL1/ABCA1/CYP1B1/CYP4F2/CYP2E1	5
BP	GO:0006637	acyl-CoA metabolic process	4/49	96/18723	0.000115223	0.00179849	0.00120233	ACSL1/ELOVL4/DGAT2/MCEE	4
BP	GO:0035383	thioester metabolic process	4/49	96/18723	0.000115223	0.00179849	0.00120233	ACSL1/ELOVL4/DGAT2/MCEE	4
BP	GO:0046473	phosphatidic acid metabolic process	3/49	37/18723	0.000122941	0.00189154	0.00126454	ABHD5/AGPAT5/LCLAT1	3
BP	GO:0035337	fatty-acyl-CoA metabolic process	3/49	38/18723	0.000133234	0.00202103	0.0013511	ACSL1/ELOVL4/DGAT2	3
BP	GO:0098869	cellular oxidant detoxification	4/49	101/18723	0.000140266	0.00209815	0.00140266	CD36/PTGS1/PTGS2/ALOX5AP	4
BP	GO:0090207	regulation of triglyceride metabolic process	3/49	39/18723	0.000144071	0.00212069	0.00141773	ABHD5/DGAT2/MBOAT7	3
BP	GO:0034308	primary alcohol metabolic process	4/49	102/18723	0.000145711	0.00212069	0.00141773	CYP1B1/DGAT2/GDPD3/PNPLA4	4
BP	GO:0019395	fatty acid oxidation	4/49	103/18723	0.000151308	0.0021442	0.00143345	DGAT2/CROT/PHYH/ALOX12	4
BP	GO:0030148	sphingolipid biosynthetic process	4/49	103/18723	0.000151308	0.0021442	0.00143345	ELOVL4/ASAH1/SGMS2/ORMDL2	4
BP	GO:0019432	triglyceride biosynthetic process	3/49	42/18723	0.00017998	0.00250821	0.0016768	ACSL1/DGAT2/GK	3
BP	GO:0034440	lipid oxidation	4/49	108/18723	0.000181653	0.00250821	0.0016768	DGAT2/CROT/PHYH/ALOX12	4
BP	GO:0032365	intracellular lipid transport	3/49	43/18723	0.000193123	0.00262438	0.00175446	ABCA1/ARV1/STARD4	3
BP	GO:1905954	positive regulation of lipid localization	4/49	110/18723	0.00019494	0.00262438	0.00175446	ACSL1/CD36/ABCA1/CYP4F2	4
BP	GO:0051235	maintenance of location	6/49	327/18723	0.00020139	0.002651	0.00177225	ABHD5/CD36/ABCA1/DGAT2/STARD4/INSIG2	6
BP	GO:0006805	xenobiotic metabolic process	4/49	111/18723	0.00020184	0.002651	0.00177225	ACSL1/CYP1B1/CYP4F2/CYP2E1	4
BP	GO:0006775	fat-soluble vitamin metabolic process	3/49	44/18723	0.000206874	0.00268437	0.00179457	CYP4F3/CYP27A1/CYP4F2	3
BP	GO:0019751	polyol metabolic process	4/49	114/18723	0.000223598	0.00286685	0.00191656	DGAT2/CYP27A1/ASAH1/GK	4
BP	GO:1990748	cellular detoxification	4/49	116/18723	0.000239011	0.00302841	0.00202456	CD36/PTGS1/PTGS2/ALOX5AP	4
BP	GO:0030301	cholesterol transport	4/49	117/18723	0.000246998	0.00309322	0.00206789	CD36/ABCA1/ARV1/STARD4	4
BP	GO:0006692	prostanoid metabolic process	3/49	49/18723	0.000285153	0.00336199	0.00224757	TBXAS1/PTGS1/PTGS2	3
BP	GO:0006693	prostaglandin metabolic process	3/49	49/18723	0.000285153	0.00336199	0.00224757	TBXAS1/PTGS1/PTGS2	3
BP	GO:0008206	bile acid metabolic process	3/49	49/18723	0.000285153	0.00336199	0.00224757	CYP27A1/ARV1/STARD4	3
BP	GO:0009395	phospholipid catabolic process	3/49	49/18723	0.000285153	0.00336199	0.00224757	PLBD1/GPCPD1/GDPD3	3
BP	GO:0015911	long-chain fatty acid import across plasma membrane	2/49	10/18723	0.000297924	0.00336199	0.00224757	ACSL1/CD36	2
BP	GO:0035376	sterol import	2/49	10/18723	0.000297924	0.00336199	0.00224757	CD36/STARD4	2
BP	GO:0070508	cholesterol import	2/49	10/18723	0.000297924	0.00336199	0.00224757	CD36/STARD4	2
BP	GO:0042572	retinol metabolic process	3/49	50/18723	0.000302798	0.00336199	0.00224757	CYP1B1/DGAT2/PNPLA4	3
BP	GO:0046460	neutral lipid biosynthetic process	3/49	50/18723	0.000302798	0.00336199	0.00224757	ACSL1/DGAT2/GK	3
BP	GO:0046463	acylglycerol biosynthetic process	3/49	50/18723	0.000302798	0.00336199	0.00224757	ACSL1/DGAT2/GK	3
BP	GO:1901570	fatty acid derivative biosynthetic process	3/49	50/18723	0.000302798	0.00336199	0.00224757	ACSL1/ELOVL4/ALOX12	3
BP	GO:0097237	cellular response to toxic substance	4/49	124/18723	0.000308385	0.00338908	0.00226568	CD36/PTGS1/PTGS2/ALOX5AP	4
BP	GO:0019372	lipoxygenase pathway	2/49	11/18723	0.000363521	0.00394629	0.00263819	ALOX5AP/ALOX12	2
BP	GO:0015918	sterol transport	4/49	130/18723	0.000369126	0.00394629	0.00263819	CD36/ABCA1/ARV1/STARD4	4
BP	GO:0046395	carboxylic acid catabolic process	5/49	236/18723	0.000370079	0.00394629	0.00263819	CYP4F3/CYP4F2/CROT/MCEE/PHYH	5
BP	GO:0016054	organic acid catabolic process	5/49	240/18723	0.000399674	0.00420873	0.00281364	CYP4F3/CYP4F2/CROT/MCEE/PHYH	5
BP	GO:0010565	regulation of cellular ketone metabolic process	4/49	133/18723	0.000402506	0.00420873	0.00281364	DGAT2/PTGS2/STARD4/INSIG2	4
BP	GO:0010883	regulation of lipid storage	3/49	57/18723	0.000446258	0.00462134	0.00308948	ABHD5/CD36/ABCA1	3
BP	GO:0046165	alcohol biosynthetic process	4/49	140/18723	0.000488712	0.00501279	0.00335117	CYP27A1/ARV1/ASAH1/INSIG2	4
BP	GO:0016024	CDP-diacylglycerol biosynthetic process	2/49	13/18723	0.000513817	0.00518955	0.00346934	AGPAT5/LCLAT1	2
BP	GO:0046467	membrane lipid biosynthetic process	4/49	142/18723	0.000515582	0.00518955	0.00346934	ELOVL4/ASAH1/SGMS2/ORMDL2	4
BP	GO:0009636	response to toxic substance	5/49	262/18723	0.000595697	0.00585939	0.00391714	CD36/CYP1B1/PTGS1/PTGS2/ALOX5AP	5
BP	GO:0042363	fat-soluble vitamin catabolic process	2/49	14/18723	0.000598452	0.00585939	0.00391714	CYP4F3/CYP4F2	2
BP	GO:0046341	CDP-diacylglycerol metabolic process	2/49	14/18723	0.000598452	0.00585939	0.00391714	AGPAT5/LCLAT1	2
BP	GO:0032368	regulation of lipid transport	4/49	149/18723	0.000617939	0.00594215	0.00397247	ACSL1/ABCA1/CYP4F2/ARV1	4
BP	GO:0045834	positive regulation of lipid metabolic process	4/49	149/18723	0.000617939	0.00594215	0.00397247	ABHD5/DGAT2/PTGS2/STARD4	4
BP	GO:0016126	sterol biosynthetic process	3/49	64/18723	0.000627323	0.005979	0.0039971	CH25H/ARV1/INSIG2	3
BP	GO:0015909	long-chain fatty acid transport	3/49	65/18723	0.000656471	0.006148	0.00411008	ACSL1/CD36/PLA2G12A	3
BP	GO:0046513	ceramide biosynthetic process	3/49	65/18723	0.000656471	0.006148	0.00411008	ASAH1/SGMS2/ORMDL2	3
BP	GO:0098754	detoxification	4/49	152/18723	0.000665935	0.00618286	0.00413339	CD36/PTGS1/PTGS2/ALOX5AP	4
BP	GO:1905953	negative regulation of lipid localization	3/49	66/18723	0.000686471	0.00623907	0.00417097	ABHD5/ABCA1/CYP4F2	3
BP	GO:0042182	ketone catabolic process	2/49	15/18723	0.000689368	0.00623907	0.00417097	CYP4F3/CYP4F2	2
BP	GO:0046459	short-chain fatty acid metabolic process	2/49	15/18723	0.000689368	0.00623907	0.00417097	MCEE/PHYH	2
BP	GO:0050810	regulation of steroid biosynthetic process	3/49	69/18723	0.000781676	0.00695746	0.00465123	ASAH1/STARD4/INSIG2	3
BP	GO:0009111	vitamin catabolic process	2/49	16/18723	0.000786534	0.00695746	0.00465123	CYP4F3/CYP4F2	2
BP	GO:0046488	phosphatidylinositol metabolic process	4/49	159/18723	0.000788125	0.00695746	0.00465123	BMX/MBOAT7/PIK3C2B/LCLAT1	4
BP	GO:0044539	long-chain fatty acid import into cell	2/49	17/18723	0.000889916	0.00766752	0.00512592	ACSL1/CD36	2
BP	GO:0140354	lipid import into cell	2/49	17/18723	0.000889916	0.00766752	0.00512592	ACSL1/CD36	2
BP	GO:1901569	fatty acid derivative catabolic process	2/49	17/18723	0.000889916	0.00766752	0.00512592	CYP4F3/CYP4F2	2
BP	GO:1902001	fatty acid transmembrane transport	2/49	18/18723	0.000999485	0.00854321	0.00571134	ACSL1/CD36	2
BP	GO:0006809	nitric oxide biosynthetic process	3/49	76/18723	0.00103544	0.00878086	0.00587021	CD36/CYP1B1/PTGS2	3
BP	GO:0001659	temperature homeostasis	4/49	174/18723	0.00110199	0.00916853	0.00612938	ACSL1/CD36/G0S2/PTGS2	4
BP	GO:0006071	glycerol metabolic process	2/49	19/18723	0.00111521	0.00916853	0.00612938	DGAT2/GK	2
BP	GO:0010885	regulation of cholesterol storage	2/49	19/18723	0.00111521	0.00916853	0.00612938	CD36/ABCA1	2
BP	GO:0035338	long-chain fatty-acyl-CoA biosynthetic process	2/49	19/18723	0.00111521	0.00916853	0.00612938	ACSL1/ELOVL4	2
BP	GO:0015849	organic acid transport	5/49	303/18723	0.00114348	0.00932976	0.00623717	ACSL1/CD36/CYP4F2/PLA2G12A/CROT	5
BP	GO:0009410	response to xenobiotic stimulus	6/49	462/18723	0.00124412	0.00993395	0.00664108	ACSL1/ABCA1/CYP1B1/CYP4F2/CYP2E1/PTGS2	6
BP	GO:0001523	retinoid metabolic process	3/49	81/18723	0.0012452	0.00993395	0.00664108	CYP1B1/DGAT2/PNPLA4	3
BP	GO:0046209	nitric oxide metabolic process	3/49	81/18723	0.0012452	0.00993395	0.00664108	CD36/CYP1B1/PTGS2	3
BP	GO:0046889	positive regulation of lipid biosynthetic process	3/49	82/18723	0.00129012	0.0101421	0.0067802	DGAT2/PTGS2/STARD4	3
BP	GO:2001057	reactive nitrogen species metabolic process	3/49	82/18723	0.00129012	0.0101421	0.0067802	CD36/CYP1B1/PTGS2	3
BP	GO:0032370	positive regulation of lipid transport	3/49	84/18723	0.001383	0.0107934	0.00721564	ACSL1/ABCA1/CYP4F2	3
BP	GO:0097006	regulation of plasma lipoprotein particle levels	3/49	85/18723	0.00143097	0.0110875	0.00741222	CD36/ABCA1/DGAT2	3
BP	GO:0019400	alditol metabolic process	2/49	22/18723	0.00149898	0.011369	0.00760045	DGAT2/GK	2
BP	GO:0071404	cellular response to low-density lipoprotein particle stimulus	2/49	22/18723	0.00149898	0.011369	0.00760045	CD36/ABCA1	2
BP	GO:2000193	positive regulation of fatty acid transport	2/49	22/18723	0.00149898	0.011369	0.00760045	ACSL1/CYP4F2	2
BP	GO:0016101	diterpenoid metabolic process	3/49	87/18723	0.00153003	0.0115234	0.00770365	CYP1B1/DGAT2/PNPLA4	3
BP	GO:0010888	negative regulation of lipid storage	2/49	23/18723	0.001639	0.0121738	0.00813848	ABHD5/ABCA1	2
BP	GO:0090208	positive regulation of triglyceride metabolic process	2/49	23/18723	0.001639	0.0121738	0.00813848	ABHD5/DGAT2	2
BP	GO:0062012	regulation of small molecule metabolic process	5/49	334/18723	0.0017572	0.0129623	0.00866563	DGAT2/ARV1/PTGS2/STARD4/INSIG2	5
BP	GO:0019217	regulation of fatty acid metabolic process	3/49	93/18723	0.00185269	0.0135738	0.00907442	DGAT2/PTGS2/INSIG2	3
BP	GO:0036315	cellular response to sterol	2/49	25/18723	0.001937	0.014001	0.00936001	ABCA1/INSIG2	2
BP	GO:0046949	fatty-acyl-CoA biosynthetic process	2/49	25/18723	0.001937	0.014001	0.00936001	ACSL1/ELOVL4	2
BP	GO:0120162	positive regulation of cold-induced thermogenesis	3/49	97/18723	0.00208967	0.0149419	0.00998902	ACSL1/CD36/G0S2	3
BP	GO:0006706	steroid catabolic process	2/49	26/18723	0.00209492	0.0149419	0.00998902	HSD11B1/CYP27A1	2
BP	GO:0018904	ether metabolic process	2/49	27/18723	0.00225874	0.0160044	0.0106993	LPCAT2/ALOX12	2
BP	GO:0009062	fatty acid catabolic process	3/49	100/18723	0.00227923	0.016044	0.0107258	CROT/MCEE/PHYH	3
BP	GO:0006672	ceramide metabolic process	3/49	102/18723	0.00241135	0.0166588	0.0111368	ASAH1/SGMS2/ORMDL2	3
BP	GO:0045833	negative regulation of lipid metabolic process	3/49	102/18723	0.00241135	0.0166588	0.0111368	DGAT2/ORMDL2/INSIG2	3
BP	GO:0002675	positive regulation of acute inflammatory response	2/49	28/18723	0.00242844	0.0166588	0.0111368	PTGS2/ALOX5AP	2
BP	GO:0010575	positive regulation of vascular endothelial growth factor production	2/49	28/18723	0.00242844	0.0166588	0.0111368	CYP1B1/PTGS2	2
BP	GO:0006656	phosphatidylcholine biosynthetic process	2/49	29/18723	0.00260398	0.017528	0.0117179	CEPT1/SLC44A3	2
BP	GO:0019433	triglyceride catabolic process	2/49	29/18723	0.00260398	0.017528	0.0117179	ABHD5/PNPLA4	2
BP	GO:0042759	long-chain fatty acid biosynthetic process	2/49	29/18723	0.00260398	0.017528	0.0117179	CYP2E1/ALOX12	2
BP	GO:0009150	purine ribonucleotide metabolic process	5/49	368/18723	0.00267761	0.0178809	0.0119538	ACSL1/ELOVL4/DGAT2/CROT/MCEE	5
BP	GO:0006766	vitamin metabolic process	3/49	106/18723	0.00268961	0.0178809	0.0119538	CYP4F3/CYP27A1/CYP4F2	3
BP	GO:0010743	regulation of macrophage derived foam cell differentiation	2/49	32/18723	0.00316534	0.0206611	0.0138124	CD36/ABCA1	2
BP	GO:0046475	glycerophospholipid catabolic process	2/49	32/18723	0.00316534	0.0206611	0.0138124	GPCPD1/GDPD3	2
BP	GO:2000191	regulation of fatty acid transport	2/49	32/18723	0.00316534	0.0206611	0.0138124	ACSL1/CYP4F2	2
BP	GO:0009259	ribonucleotide metabolic process	5/49	385/18723	0.00325049	0.021089	0.0140985	ACSL1/ELOVL4/DGAT2/CROT/MCEE	5
BP	GO:0034383	low-density lipoprotein particle clearance	2/49	34/18723	0.00356824	0.022875	0.0152925	CD36/DGAT2	2
BP	GO:0055094	response to lipoprotein particle	2/49	34/18723	0.00356824	0.022875	0.0152925	CD36/ABCA1	2
BP	GO:0006163	purine nucleotide metabolic process	5/49	396/18723	0.00366547	0.0232218	0.0155243	ACSL1/ELOVL4/DGAT2/CROT/MCEE	5
BP	GO:0019693	ribose phosphate metabolic process	5/49	396/18723	0.00366547	0.0232218	0.0155243	ACSL1/ELOVL4/DGAT2/CROT/MCEE	5
BP	GO:0034405	response to fluid shear stress	2/49	35/18723	0.0037782	0.0233858	0.0156339	ABCA1/PTGS2	2
BP	GO:0045907	positive regulation of vasoconstriction	2/49	35/18723	0.0037782	0.0233858	0.0156339	TBXAS1/PTGS2	2
BP	GO:0045922	negative regulation of fatty acid metabolic process	2/49	35/18723	0.0037782	0.0233858	0.0156339	DGAT2/INSIG2	2
BP	GO:0090181	regulation of cholesterol metabolic process	2/49	35/18723	0.0037782	0.0233858	0.0156339	DGAT2/ARV1	2
BP	GO:0006699	bile acid biosynthetic process	2/49	36/18723	0.00399379	0.0241647	0.0161547	CYP27A1/STARD4	2
BP	GO:0036314	response to sterol	2/49	36/18723	0.00399379	0.0241647	0.0161547	ABCA1/INSIG2	2
BP	GO:0046466	membrane lipid catabolic process	2/49	36/18723	0.00399379	0.0241647	0.0161547	CYP1B1/ASAH1	2
BP	GO:0071402	cellular response to lipoprotein particle stimulus	2/49	36/18723	0.00399379	0.0241647	0.0161547	CD36/ABCA1	2
BP	GO:0042178	xenobiotic catabolic process	2/49	37/18723	0.00421498	0.0253605	0.0169541	ACSL1/CYP2E1	2
BP	GO:0010742	macrophage derived foam cell differentiation	2/49	38/18723	0.00444175	0.0264296	0.0176688	CD36/ABCA1	2
BP	GO:0090077	foam cell differentiation	2/49	38/18723	0.00444175	0.0264296	0.0176688	CD36/ABCA1	2
BP	GO:0072521	purine-containing compound metabolic process	5/49	416/18723	0.00451582	0.0267227	0.0178648	ACSL1/ELOVL4/DGAT2/CROT/MCEE	5
BP	GO:0046461	neutral lipid catabolic process	2/49	39/18723	0.00467405	0.0273585	0.0182898	ABHD5/PNPLA4	2
BP	GO:0046464	acylglycerol catabolic process	2/49	39/18723	0.00467405	0.0273585	0.0182898	ABHD5/PNPLA4	2
BP	GO:0006661	phosphatidylinositol biosynthetic process	3/49	131/18723	0.00487677	0.0281388	0.0188114	BMX/MBOAT7/PIK3C2B	3
BP	GO:0032892	positive regulation of organic acid transport	2/49	40/18723	0.00491187	0.0281388	0.0188114	ACSL1/CYP4F2	2
BP	GO:0045429	positive regulation of nitric oxide biosynthetic process	2/49	40/18723	0.00491187	0.0281388	0.0188114	CD36/PTGS2	2
BP	GO:1901661	quinone metabolic process	2/49	40/18723	0.00491187	0.0281388	0.0188114	CYP4F3/CYP4F2	2
BP	GO:1904407	positive regulation of nitric oxide metabolic process	2/49	41/18723	0.00515518	0.0293763	0.0196388	CD36/PTGS2	2
BP	GO:0034754	cellular hormone metabolic process	3/49	137/18723	0.00552291	0.0313062	0.0209289	CYP1B1/DGAT2/PNPLA4	3
BP	GO:0006979	response to oxidative stress	5/49	446/18723	0.00604359	0.0340783	0.0227821	CD36/CYP1B1/CYP2E1/PTGS1/PTGS2	5
BP	GO:0032309	icosanoid secretion	2/49	45/18723	0.00618266	0.0343233	0.022946	CYP4F2/PLA2G12A	2
BP	GO:0035384	thioester biosynthetic process	2/49	45/18723	0.00618266	0.0343233	0.022946	ACSL1/ELOVL4	2
BP	GO:0071616	acyl-CoA biosynthetic process	2/49	45/18723	0.00618266	0.0343233	0.022946	ACSL1/ELOVL4	2
BP	GO:0062013	positive regulation of small molecule metabolic process	3/49	143/18723	0.00621824	0.0343438	0.0229597	DGAT2/PTGS2/STARD4	3
BP	GO:0106106	cold-induced thermogenesis	3/49	144/18723	0.00633898	0.0346552	0.0231678	ACSL1/CD36/G0S2	3
BP	GO:0120161	regulation of cold-induced thermogenesis	3/49	144/18723	0.00633898	0.0346552	0.0231678	ACSL1/CD36/G0S2	3
BP	GO:0015850	organic hydroxy compound transport	4/49	284/18723	0.00642702	0.0349591	0.023371	CD36/ABCA1/ARV1/STARD4	4
BP	GO:0002673	regulation of acute inflammatory response	2/49	48/18723	0.00700944	0.0377458	0.025234	PTGS2/ALOX5AP	2
BP	GO:0120009	intermembrane lipid transfer	2/49	48/18723	0.00700944	0.0377458	0.025234	ABCA1/STARD4	2
BP	GO:0042304	regulation of fatty acid biosynthetic process	2/49	49/18723	0.00729558	0.0390912	0.0261334	PTGS2/INSIG2	2
BP	GO:0046434	organophosphate catabolic process	3/49	155/18723	0.00776022	0.0413751	0.0276602	PLBD1/GPCPD1/GDPD3	3
BP	GO:1990845	adaptive thermogenesis	3/49	157/18723	0.00803721	0.0424605	0.0283859	ACSL1/CD36/G0S2	3
BP	GO:0007162	negative regulation of cell adhesion	4/49	303/18723	0.00804266	0.0424605	0.0283859	CYP1B1/TNFAIP8L2/TNFRSF21/ALOX12	4
BP	GO:0034381	plasma lipoprotein particle clearance	2/49	53/18723	0.00849212	0.0443981	0.0296812	CD36/DGAT2	2
BP	GO:0071715	icosanoid transport	2/49	53/18723	0.00849212	0.0443981	0.0296812	CYP4F2/PLA2G12A	2
BP	GO:0009117	nucleotide metabolic process	5/49	489/18723	0.00882506	0.0459159	0.0306958	ACSL1/ELOVL4/DGAT2/CROT/MCEE	5
BP	GO:0046164	alcohol catabolic process	2/49	55/18723	0.00912118	0.0472284	0.0315733	CYP27A1/GK	2
BP	GO:0006753	nucleoside phosphate metabolic process	5/49	497/18723	0.00942646	0.0485756	0.0324739	ACSL1/ELOVL4/DGAT2/CROT/MCEE	5
BP	GO:0006695	cholesterol biosynthetic process	2/49	57/18723	0.00977048	0.0496359	0.0331828	ARV1/INSIG2	2
BP	GO:0050891	multicellular organismal water homeostasis	2/49	57/18723	0.00977048	0.0496359	0.0331828	CYP4F2/ALOX12	2
BP	GO:1902653	secondary alcohol biosynthetic process	2/49	57/18723	0.00977048	0.0496359	0.0331828	ARV1/INSIG2	2
BP	GO:0010574	regulation of vascular endothelial growth factor production	2/49	58/18723	0.0101027	0.0508437	0.0339902	CYP1B1/PTGS2	2
BP	GO:0097035	regulation of membrane lipid distribution	2/49	58/18723	0.0101027	0.0508437	0.0339902	ABCA1/ARV1	2
BP	GO:0051055	negative regulation of lipid biosynthetic process	2/49	59/18723	0.0104398	0.0522961	0.0349612	ORMDL2/INSIG2	2
BP	GO:0007584	response to nutrient	3/49	174/18723	0.0106278	0.0527823	0.0352862	ACSL1/ABCA1/PTGS2	3
BP	GO:0033866	nucleoside bisphosphate biosynthetic process	2/49	60/18723	0.0107819	0.0527823	0.0352862	ACSL1/ELOVL4	2
BP	GO:0034030	ribonucleoside bisphosphate biosynthetic process	2/49	60/18723	0.0107819	0.0527823	0.0352862	ACSL1/ELOVL4	2
BP	GO:0034033	purine nucleoside bisphosphate biosynthetic process	2/49	60/18723	0.0107819	0.0527823	0.0352862	ACSL1/ELOVL4	2
BP	GO:0042306	regulation of protein import into nucleus	2/49	60/18723	0.0107819	0.0527823	0.0352862	CD36/PTGS2	2
BP	GO:0010573	vascular endothelial growth factor production	2/49	62/18723	0.0114808	0.0554477	0.0370681	CYP1B1/PTGS2	2
BP	GO:0045428	regulation of nitric oxide biosynthetic process	2/49	62/18723	0.0114808	0.0554477	0.0370681	CD36/PTGS2	2
BP	GO:0046173	polyol biosynthetic process	2/49	62/18723	0.0114808	0.0554477	0.0370681	CYP27A1/ASAH1	2
BP	GO:0006790	sulfur compound metabolic process	4/49	339/18723	0.0117942	0.0566627	0.0378803	ACSL1/ELOVL4/DGAT2/MCEE	4
BP	GO:1904589	regulation of protein import	2/49	63/18723	0.0118376	0.0566627	0.0378803	CD36/PTGS2	2
BP	GO:0030104	water homeostasis	2/49	64/18723	0.0121992	0.0578791	0.0386936	CYP4F2/ALOX12	2
BP	GO:0080164	regulation of nitric oxide metabolic process	2/49	64/18723	0.0121992	0.0578791	0.0386936	CD36/PTGS2	2
BP	GO:0008217	regulation of blood pressure	3/49	186/18723	0.0127162	0.0600673	0.0401564	CYP4F2/PTGS1/PTGS2	3
BP	GO:0019229	regulation of vasoconstriction	2/49	66/18723	0.0129369	0.0605784	0.0404981	TBXAS1/PTGS2	2
BP	GO:0030193	regulation of blood coagulation	2/49	66/18723	0.0129369	0.0605784	0.0404981	CD36/ALOX12	2
BP	GO:0032890	regulation of organic acid transport	2/49	67/18723	0.0133129	0.0620691	0.0414947	ACSL1/CYP4F2	2
BP	GO:1900046	regulation of hemostasis	2/49	68/18723	0.0136936	0.063569	0.0424974	CD36/ALOX12	2
BP	GO:0022408	negative regulation of cell-cell adhesion	3/49	196/18723	0.014624	0.067597	0.0451902	TNFAIP8L2/TNFRSF21/ALOX12	3
BP	GO:0050818	regulation of coagulation	2/49	71/18723	0.0148639	0.0684121	0.0457351	CD36/ALOX12	2
BP	GO:0006801	superoxide metabolic process	2/49	74/18723	0.0160759	0.0736755	0.0492538	CD36/ALOX12	2
CC	GO:0031227	intrinsic component of endoplasmic reticulum membrane	6/49	170/19550	4.06e-06	0.000163165	0.000121749	HSD11B1/ELOVL4/DGAT2/CYP2E1/SGMS2/INSIG2	6
CC	GO:0005811	lipid droplet	5/49	96/19550	4.13e-06	0.000163165	0.000121749	ABHD5/LPCAT2/DGAT2/G0S2/PNPLA4	5
CC	GO:0030176	integral component of endoplasmic reticulum membrane	5/49	162/19550	5.22e-05	0.00137377	0.00102506	HSD11B1/ELOVL4/DGAT2/SGMS2/INSIG2	5
CC	GO:0031300	intrinsic component of organelle membrane	6/49	417/19550	0.00058491	0.011552	0.00861973	HSD11B1/ELOVL4/DGAT2/CYP2E1/SGMS2/INSIG2	6
CC	GO:0031968	organelle outer membrane	4/49	230/19550	0.00261202	0.0311832	0.0232679	ACSL1/AGPAT5/PTGS2/GK	4
CC	GO:0019867	outer membrane	4/49	232/19550	0.00269482	0.0311832	0.0232679	ACSL1/AGPAT5/PTGS2/GK	4
CC	GO:0031301	integral component of organelle membrane	5/49	387/19550	0.00276307	0.0311832	0.0232679	HSD11B1/ELOVL4/DGAT2/SGMS2/INSIG2	5
CC	GO:0005777	peroxisome	3/49	142/19550	0.00541496	0.0475313	0.0354664	ACSL1/CROT/PHYH	3
CC	GO:0042579	microbody	3/49	142/19550	0.00541496	0.0475313	0.0354664	ACSL1/CROT/PHYH	3
CC	GO:0005782	peroxisomal matrix	2/49	51/19550	0.00725559	0.0521084	0.0388817	CROT/PHYH	2
CC	GO:0031907	microbody lumen	2/49	51/19550	0.00725559	0.0521084	0.0388817	CROT/PHYH	2
MF	GO:0008374	O-acyltransferase activity	8/49	54/18368	1.33e-12	1.25e-10	7.05e-11	ABHD5/MBOAT2/LPCAT2/DGAT2/MBOAT7/CROT/AGPAT5/LCLAT1	8
MF	GO:0016411	acylglycerol O-acyltransferase activity	7/49	31/18368	1.54e-12	1.25e-10	7.05e-11	ABHD5/MBOAT2/LPCAT2/DGAT2/MBOAT7/AGPAT5/LCLAT1	7
MF	GO:0003841	1-acylglycerol-3-phosphate O-acyltransferase activity	6/49	21/18368	1.38e-11	6.91e-10	3.91e-10	ABHD5/MBOAT2/LPCAT2/MBOAT7/AGPAT5/LCLAT1	6
MF	GO:0016705	oxidoreductase activity, acting on paired donors, with incorporation or reduction of molecular oxygen	10/49	170/18368	2.13e-11	6.91e-10	3.91e-10	CH25H/CYP1B1/CYP4F3/CYP27A1/CYP4F2/CYP2E1/TBXAS1/PTGS1/PTGS2/PHYH	10
MF	GO:0042171	lysophosphatidic acid acyltransferase activity	6/49	23/18368	2.56e-11	6.91e-10	3.91e-10	ABHD5/MBOAT2/LPCAT2/MBOAT7/AGPAT5/LCLAT1	6
MF	GO:0071617	lysophospholipid acyltransferase activity	6/49	23/18368	2.56e-11	6.91e-10	3.91e-10	ABHD5/MBOAT2/LPCAT2/MBOAT7/AGPAT5/LCLAT1	6
MF	GO:0005506	iron ion binding	9/49	151/18368	2.09e-10	4.85e-09	2.74e-09	CH25H/CYP1B1/CYP4F3/CYP27A1/CYP4F2/CYP2E1/TBXAS1/PHYH/ALOX12	9
MF	GO:0020037	heme binding	8/49	139/18368	3.05e-09	6.17e-08	3.49e-08	CYP1B1/CYP4F3/CYP27A1/CYP4F2/CYP2E1/TBXAS1/PTGS1/PTGS2	8
MF	GO:0046906	tetrapyrrole binding	8/49	149/18368	5.28e-09	9.51e-08	5.38e-08	CYP1B1/CYP4F3/CYP27A1/CYP4F2/CYP2E1/TBXAS1/PTGS1/PTGS2	8
MF	GO:0016747	acyltransferase activity, transferring groups other than amino-acyl groups	9/49	222/18368	6.32e-09	1.02e-07	5.79e-08	ABHD5/MBOAT2/LPCAT2/ELOVL4/DGAT2/MBOAT7/CROT/AGPAT5/LCLAT1	9
MF	GO:0004497	monooxygenase activity	7/49	102/18368	9.38e-09	1.38e-07	7.81e-08	CH25H/CYP1B1/CYP4F3/CYP27A1/CYP4F2/CYP2E1/TBXAS1	7
MF	GO:0016746	acyltransferase activity	9/49	250/18368	1.77e-08	2.4e-07	1.35e-07	ABHD5/MBOAT2/LPCAT2/ELOVL4/DGAT2/MBOAT7/CROT/AGPAT5/LCLAT1	9
MF	GO:0070330	aromatase activity	4/49	25/18368	5.42e-07	6.76e-06	3.82e-06	CYP1B1/CYP4F3/CYP4F2/CYP2E1	4
MF	GO:0008395	steroid hydroxylase activity	4/49	38/18368	3.09e-06	3.57e-05	2.02e-05	CH25H/CYP1B1/CYP27A1/CYP2E1	4
MF	GO:0016712	oxidoreductase activity, acting on paired donors, with incorporation or reduction of molecular oxygen, reduced flavin or flavoprotein as one donor, and incorporation of one atom of oxygen	4/49	40/18368	3.81e-06	4.11e-05	2.32e-05	CYP1B1/CYP4F3/CYP4F2/CYP2E1	4
MF	GO:0051213	dioxygenase activity	5/49	92/18368	4.53e-06	4.58e-05	2.59e-05	PTGS1/PTGS2/ALOX5AP/PHYH/ALOX12	5
MF	GO:0016709	oxidoreductase activity, acting on paired donors, with incorporation or reduction of molecular oxygen, NAD(P)H as one donor, and incorporation of one atom of oxygen	4/49	43/18368	5.11e-06	4.87e-05	2.75e-05	CH25H/CYP27A1/CYP4F2/CYP2E1	4
MF	GO:0008391	arachidonic acid monooxygenase activity	3/49	21/18368	2.29e-05	0.000206455	0.00011671	CYP4F3/CYP4F2/CYP2E1	3
MF	GO:0016702	oxidoreductase activity, acting on single donors with incorporation of molecular oxygen, incorporation of two atoms of oxygen	3/49	23/18368	3.04e-05	0.000259466	0.000146677	PTGS2/ALOX5AP/ALOX12	3
MF	GO:0016701	oxidoreductase activity, acting on single donors with incorporation of molecular oxygen	3/49	24/18368	3.47e-05	0.000281178	0.00015895	PTGS2/ALOX5AP/ALOX12	3
MF	GO:0015248	sterol transporter activity	3/49	36/18368	0.000119731	0.000923638	0.000522134	ABCA1/ARV1/STARD4	3
MF	GO:0005496	steroid binding	4/49	100/18368	0.000145193	0.00106915	0.000604391	ABCA1/HSD11B1/STARD4/INSIG2	4
MF	GO:0004601	peroxidase activity	3/49	51/18368	0.000339535	0.00239151	0.00135192	PTGS1/PTGS2/ALOX5AP	3
MF	GO:0016298	lipase activity	4/49	129/18368	0.000385193	0.00260006	0.00146982	PLBD1/PLA2G12A/GDPD3/PNPLA4	4
MF	GO:0016684	oxidoreductase activity, acting on peroxide as acceptor	3/49	55/18368	0.000424549	0.00275107	0.00155519	PTGS1/PTGS2/ALOX5AP	3
MF	GO:0016614	oxidoreductase activity, acting on CH-OH group of donors	4/49	136/18368	0.000470543	0.00293184	0.00165738	HSD11B1/CYP4F3/CYP27A1/CYP4F2	4
MF	GO:0008035	high-density lipoprotein particle binding	2/49	13/18368	0.000533681	0.00317409	0.00179432	CD36/ABCA1	2
MF	GO:0032934	sterol binding	3/49	60/18368	0.000548608	0.00317409	0.00179432	ABCA1/STARD4/INSIG2	3
MF	GO:0052689	carboxylic ester hydrolase activity	4/49	147/18368	0.000630736	0.00352342	0.0019918	ABHD5/PLA2G12A/GDPD3/PNPLA4	4
MF	GO:0005319	lipid transporter activity	4/49	154/18368	0.000750843	0.00405455	0.00229205	CD36/ABCA1/ARV1/STARD4	4
MF	GO:0008392	arachidonic acid epoxygenase activity	2/49	17/18368	0.000924201	0.00482969	0.00273024	CYP4F2/CYP2E1	2
MF	GO:0016780	phosphotransferase activity, for other substituted phosphate groups	2/49	20/18368	0.00128458	0.0065032	0.00367628	SGMS2/CEPT1	2
MF	GO:0120020	cholesterol transfer activity	2/49	22/18368	0.00155648	0.00744657	0.00420956	ABCA1/STARD4	2
MF	GO:0016209	antioxidant activity	3/49	86/18368	0.00156286	0.00744657	0.00420956	PTGS1/PTGS2/ALOX5AP	3
MF	GO:0120015	sterol transfer activity	2/49	23/18368	0.00170181	0.00787697	0.00445287	ABCA1/STARD4	2
MF	GO:0004620	phospholipase activity	3/49	104/18368	0.00268912	0.012101	0.00684074	PLBD1/PLA2G12A/GDPD3	3
MF	GO:0071813	lipoprotein particle binding	2/49	31/18368	0.00308558	0.0131543	0.00743617	CD36/ABCA1	2
MF	GO:0071814	protein-lipid complex binding	2/49	31/18368	0.00308558	0.0131543	0.00743617	CD36/ABCA1	2
MF	GO:0120013	lipid transfer activity	2/49	48/18368	0.00727225	0.0302078	0.0170765	ABCA1/STARD4	2
MF	GO:0015485	cholesterol binding	2/49	50/18368	0.0078709	0.0318772	0.0180202	ABCA1/STARD4	2
MF	GO:0016765	transferase activity, transferring alkyl or aryl (other than methyl) groups	2/49	58/18368	0.0104781	0.0414013	0.0234042	GGPS1/ALOX5AP	2
MF	GO:0016836	hydro-lyase activity	2/49	64/18368	0.0126502	0.0487935	0.0275831	CYP1B1/TBXAS1	2
MF	GO:0016829	lyase activity	3/49	196/18368	0.015384	0.0579583	0.0327639	CYP1B1/TBXAS1/ALOX5AP	3
MF	GO:0038024	cargo receptor activity	2/49	77/18368	0.0179621	0.066133	0.0373851	CD36/ABCA1	2
MF	GO:0016835	carbon-oxygen lyase activity	2/49	79/18368	0.0188499	0.0678598	0.0383613	CYP1B1/TBXAS1	2
MF	GO:0008081	phosphoric diester hydrolase activity	2/49	89/18368	0.0235588	0.0812026	0.045904	GPCPD1/GDPD3	2
MF	GO:0043178	alcohol binding	2/49	89/18368	0.0235588	0.0812026	0.045904	ABCA1/STARD4	2
MF	GO:0016303	1-phosphatidylinositol-3-kinase activity	1/49	10/18368	0.0263652	0.0854234	0.04829	PIK3C2B	1
MF	GO:0016803	ether hydrolase activity	1/49	10/18368	0.0263652	0.0854234	0.04829	ALOX12	1
MF	GO:0036312	phosphatidylinositol 3-kinase regulatory subunit binding	1/49	10/18368	0.0263652	0.0854234	0.04829	PTPN13	1
