# Supplementary material for: ACSL1, CH25H, GPCPD1, and PLA2G12A as the potential lipid-related diagnostic biomarkers of acute myocardial infarction
Source: Aging (Albany NY). 2023 Feb 24;15(5):1394–411. doi: 10.18632/aging.204542 (PMC10042701; doi:10.18632/aging.204542)
Supplement: Supplementary Table 3 [file aging-15-204542-s004.xlsx]

## Sheet: Sheet1
Supplementary Table 3. Summary of 742 lipid-related genes.
Gene	Type
AACS	lipid
ABCA1	lipid
ABCB11	lipid
ABCB4	lipid
ABCC1	lipid
ABCC3	lipid
ABCD1	lipid
ABHD3	lipid
ABHD4	lipid
ABHD5	lipid
ACAA1	lipid
ACAA2	lipid
ACACA	lipid
ACACB	lipid
ACAD10	lipid
ACAD11	lipid
ACADL	lipid
ACADM	lipid
ACADS	lipid
ACADVL	lipid
ACAT1	lipid
ACAT2	lipid
ACBD4	lipid
ACBD5	lipid
ACBD6	lipid
ACBD7	lipid
ACER1	lipid
ACER2	lipid
ACER3	lipid
ACHE	lipid
ACLY	lipid
ACOT1	lipid
ACOT11	lipid
ACOT12	lipid
ACOT13	lipid
ACOT2	lipid
ACOT4	lipid
ACOT6	lipid
ACOT7	lipid
ACOT8	lipid
ACOT9	lipid
ACOX1	lipid
ACOX2	lipid
ACOX3	lipid
ACOXL	lipid
ACP6	lipid
ACSBG1	lipid
ACSBG2	lipid
ACSF2	lipid
ACSF3	lipid
ACSL1	lipid
ACSL3	lipid
ACSL4	lipid
ACSL5	lipid
ACSL6	lipid
ACSM3	lipid
ACSM6	lipid
ACSS3	lipid
AGK	lipid
AGMO	lipid
AGPAT1	lipid
AGPAT2	lipid
AGPAT3	lipid
AGPAT4	lipid
AGPAT5	lipid
AGPS	lipid
AGT	lipid
AHR	lipid
AKR1B1	lipid
AKR1B15	lipid
AKR1C1	lipid
AKR1C2	lipid
AKR1C3	lipid
AKR1C4	lipid
AKR1D1	lipid
ALAS1	lipid
ALB	lipid
ALDH3A2	lipid
ALDH3B1	lipid
ALDH3B2	lipid
ALOX12	lipid
ALOX12B	lipid
ALOX15	lipid
ALOX15B	lipid
ALOX5	lipid
ALOX5AP	lipid
ALOXE3	lipid
ALPI	lipid
AMACR	lipid
ANGPTL4	lipid
ANKRD1	lipid
APOA1	lipid
APOA2	lipid
APOA5	lipid
ARF1	lipid
ARF3	lipid
ARNT	lipid
ARNT2	lipid
ARNTL	lipid
ARSA	lipid
ARSB	lipid
ARSD	lipid
ARSF	lipid
ARSG	lipid
ARSH	lipid
ARSI	lipid
ARSJ	lipid
ARSK	lipid
ARSL	lipid
ARV1	lipid
ASAH1	lipid
ASAH2	lipid
AWAT1	lipid
AWAT2	lipid
B3GALNT1	lipid
B4GALNT1	lipid
BAAT	lipid
BCHE	lipid
BDH1	lipid
BDH2	lipid
BMX	lipid
CARM1	lipid
CAV1	lipid
CBR1	lipid
CBR4	lipid
CCNC	lipid
CD36	lipid
CDIPT	lipid
CDK19	lipid
CDK8	lipid
CDS1	lipid
CDS2	lipid
CEPT1	lipid
CERK	lipid
CERS1	lipid
CERS2	lipid
CERS3	lipid
CERS4	lipid
CERS5	lipid
CERS6	lipid
CERT1	lipid
CGA	lipid
CH25H	lipid
CHAT	lipid
CHD9	lipid
CHKA	lipid
CHKB	lipid
CHPT1	lipid
CIDEA	lipid
CIDEC	lipid
CLOCK	lipid
CPNE1	lipid
CPNE3	lipid
CPNE6	lipid
CPNE7	lipid
CPT1A	lipid
CPT1B	lipid
CPT2	lipid
CPTP	lipid
CRAT	lipid
CREBBP	lipid
CRLS1	lipid
CROT	lipid
CSNK1G2	lipid
CSNK2A1	lipid
CSNK2A2	lipid
CSNK2B	lipid
CTSA	lipid
CUBN	lipid
CYP11A1	lipid
CYP11B1	lipid
CYP11B2	lipid
CYP17A1	lipid
CYP19A1	lipid
CYP1A1	lipid
CYP1A2	lipid
CYP1B1	lipid
CYP21A2	lipid
CYP24A1	lipid
CYP27A1	lipid
CYP27B1	lipid
CYP2C19	lipid
CYP2C8	lipid
CYP2C9	lipid
CYP2D6	lipid
CYP2E1	lipid
CYP2J2	lipid
CYP2R1	lipid
CYP2U1	lipid
CYP39A1	lipid
CYP3A4	lipid
CYP46A1	lipid
CYP4A11	lipid
CYP4A22	lipid
CYP4B1	lipid
CYP4F11	lipid
CYP4F2	lipid
CYP4F22	lipid
CYP4F3	lipid
CYP4F8	lipid
CYP51A1	lipid
CYP7A1	lipid
CYP7B1	lipid
CYP8B1	lipid
DBI	lipid
DDHD1	lipid
DDHD2	lipid
DECR1	lipid
DECR2	lipid
DEGS1	lipid
DEGS2	lipid
DGAT1	lipid
DGAT2	lipid
DGAT2L6	lipid
DHCR24	lipid
DHCR7	lipid
DHRS7B	lipid
DPEP1	lipid
DPEP2	lipid
DPEP3	lipid
EBP	lipid
ECHS1	lipid
ECI1	lipid
ECI2	lipid
EHHADH	lipid
ELOVL1	lipid
ELOVL2	lipid
ELOVL3	lipid
ELOVL4	lipid
ELOVL5	lipid
ELOVL6	lipid
ELOVL7	lipid
ENPP6	lipid
ENPP7	lipid
EP300	lipid
EPHX2	lipid
ESRRA	lipid
ESYT1	lipid
ESYT2	lipid
ESYT3	lipid
ETNK1	lipid
ETNK2	lipid
ETNPPL	lipid
FA2H	lipid
FAAH	lipid
FAAH2	lipid
FABP1	lipid
FABP12	lipid
FABP2	lipid
FABP3	lipid
FABP4	lipid
FABP5	lipid
FABP6	lipid
FABP7	lipid
FABP9	lipid
FADS1	lipid
FADS2	lipid
FAM120B	lipid
FAR1	lipid
FAR2	lipid
FASN	lipid
FDFT1	lipid
FDPS	lipid
FDX1	lipid
FDX2	lipid
FDXR	lipid
FHL2	lipid
FIG4	lipid
FITM1	lipid
FITM2	lipid
G0S2	lipid
GALC	lipid
GBA	lipid
GBA2	lipid
GC	lipid
GDE1	lipid
GDPD1	lipid
GDPD3	lipid
GDPD5	lipid
GGPS1	lipid
GGT1	lipid
GGT5	lipid
GK	lipid
GK2	lipid
GK3P	lipid
GLA	lipid
GLB1	lipid
GLB1L	lipid
GLIPR1	lipid
GLTP	lipid
GM2A	lipid
GNPAT	lipid
GPAM	lipid
GPAT2	lipid
GPAT3	lipid
GPAT4	lipid
GPCPD1	lipid
GPD1	lipid
GPD1L	lipid
GPD2	lipid
GPS2	lipid
GPX1	lipid
GPX2	lipid
GPX4	lipid
GRHL1	lipid
GSTM4	lipid
HACD1	lipid
HACD2	lipid
HACD3	lipid
HACD4	lipid
HACL1	lipid
HADH	lipid
HADHA	lipid
HADHB	lipid
HAO2	lipid
HDAC3	lipid
HELZ2	lipid
HEXA	lipid
HEXB	lipid
HILPDA	lipid
HMGCL	lipid
HMGCLL1	lipid
HMGCR	lipid
HMGCS1	lipid
HMGCS2	lipid
HPGD	lipid
HPGDS	lipid
HSD11B1	lipid
HSD11B2	lipid
HSD17B1	lipid
HSD17B11	lipid
HSD17B12	lipid
HSD17B13	lipid
HSD17B14	lipid
HSD17B2	lipid
HSD17B3	lipid
HSD17B4	lipid
HSD17B7	lipid
HSD17B8	lipid
HSD3B1	lipid
HSD3B2	lipid
HSD3B7	lipid
HTD2	lipid
IDI1	lipid
IDI2	lipid
INPP4A	lipid
INPP4B	lipid
INPP5D	lipid
INPP5E	lipid
INPP5F	lipid
INPP5J	lipid
INPP5K	lipid
INPPL1	lipid
INSIG1	lipid
INSIG2	lipid
KDSR	lipid
KPNB1	lipid
LBR	lipid
LCLAT1	lipid
LDLRAP1	lipid
LGMN	lipid
LHB	lipid
LIPE	lipid
LIPH	lipid
LIPI	lipid
LPCAT1	lipid
LPCAT2	lipid
LPCAT3	lipid
LPCAT4	lipid
LPGAT1	lipid
LPIN1	lipid
LPIN2	lipid
LPIN3	lipid
LRP2	lipid
LSS	lipid
LTA4H	lipid
LTC4S	lipid
MAPKAPK2	lipid
MBOAT1	lipid
MBOAT2	lipid
MBOAT7	lipid
MBTPS1	lipid
MBTPS2	lipid
MCAT	lipid
MCEE	lipid
ME1	lipid
MECR	lipid
MED1	lipid
MED10	lipid
MED11	lipid
MED12	lipid
MED13	lipid
MED13L	lipid
MED14	lipid
MED15	lipid
MED16	lipid
MED17	lipid
MED18	lipid
MED19	lipid
MED20	lipid
MED21	lipid
MED22	lipid
MED23	lipid
MED24	lipid
MED25	lipid
MED26	lipid
MED27	lipid
MED28	lipid
MED29	lipid
MED30	lipid
MED31	lipid
MED4	lipid
MED6	lipid
MED7	lipid
MED8	lipid
MED9	lipid
MFSD2A	lipid
MGLL	lipid
MID1IP1	lipid
MIGA1	lipid
MIGA2	lipid
MLYCD	lipid
MMAA	lipid
MMUT	lipid
MOGAT1	lipid
MOGAT2	lipid
MOGAT3	lipid
MORC2	lipid
MSMO1	lipid
MTF1	lipid
MTM1	lipid
MTMR1	lipid
MTMR10	lipid
MTMR12	lipid
MTMR14	lipid
MTMR2	lipid
MTMR3	lipid
MTMR4	lipid
MTMR6	lipid
MTMR7	lipid
MTMR8	lipid
MTMR9	lipid
MVD	lipid
MVK	lipid
NCOA1	lipid
NCOA2	lipid
NCOA3	lipid
NCOA6	lipid
NCOR1	lipid
NCOR2	lipid
NDUFAB1	lipid
NEU1	lipid
NEU2	lipid
NEU3	lipid
NEU4	lipid
NFYA	lipid
NFYB	lipid
NFYC	lipid
NPAS2	lipid
NR1D1	lipid
NR1H2	lipid
NR1H3	lipid
NR1H4	lipid
NRF1	lipid
NSDHL	lipid
NUDT19	lipid
NUDT7	lipid
OCRL	lipid
OLAH	lipid
ORMDL1	lipid
ORMDL2	lipid
ORMDL3	lipid
OSBP	lipid
OSBPL10	lipid
OSBPL1A	lipid
OSBPL2	lipid
OSBPL3	lipid
OSBPL5	lipid
OSBPL6	lipid
OSBPL7	lipid
OSBPL8	lipid
OSBPL9	lipid
OXCT1	lipid
OXCT2	lipid
PCCA	lipid
PCCB	lipid
PCTP	lipid
PCYT1A	lipid
PCYT1B	lipid
PCYT2	lipid
PECR	lipid
PEMT	lipid
PEX11A	lipid
PGS1	lipid
PHOSPHO1	lipid
PHYH	lipid
PI4K2A	lipid
PI4K2B	lipid
PI4KA	lipid
PI4KB	lipid
PIAS4	lipid
PIK3C2A	lipid
PIK3C2B	lipid
PIK3C2G	lipid
PIK3C3	lipid
PIK3CA	lipid
PIK3CB	lipid
PIK3CD	lipid
PIK3CG	lipid
PIK3R1	lipid
PIK3R2	lipid
PIK3R3	lipid
PIK3R4	lipid
PIK3R5	lipid
PIK3R6	lipid
PIKFYVE	lipid
PIP4K2A	lipid
PIP4K2B	lipid
PIP4K2C	lipid
PIP4P1	lipid
PIP5K1A	lipid
PIP5K1B	lipid
PIP5K1C	lipid
PISD	lipid
PITPNB	lipid
PITPNM1	lipid
PITPNM2	lipid
PITPNM3	lipid
PLA1A	lipid
PLA2G10	lipid
PLA2G12A	lipid
PLA2G15	lipid
PLA2G1B	lipid
PLA2G2A	lipid
PLA2G2D	lipid
PLA2G2E	lipid
PLA2G2F	lipid
PLA2G3	lipid
PLA2G4A	lipid
PLA2G4B	lipid
PLA2G4C	lipid
PLA2G4D	lipid
PLA2G4E	lipid
PLA2G4F	lipid
PLA2G5	lipid
PLA2G6	lipid
PLA2R1	lipid
PLAAT1	lipid
PLAAT2	lipid
PLAAT3	lipid
PLAAT4	lipid
PLAAT5	lipid
PLB1	lipid
PLBD1	lipid
PLD1	lipid
PLD2	lipid
PLD3	lipid
PLD4	lipid
PLD6	lipid
PLEKHA1	lipid
PLEKHA2	lipid
PLEKHA3	lipid
PLEKHA4	lipid
PLEKHA5	lipid
PLEKHA6	lipid
PLEKHA8	lipid
PLIN1	lipid
PLIN2	lipid
PLIN3	lipid
PLPP1	lipid
PLPP2	lipid
PLPP3	lipid
PLPP6	lipid
PMVK	lipid
PNPLA2	lipid
PNPLA3	lipid
PNPLA4	lipid
PNPLA5	lipid
PNPLA6	lipid
PNPLA7	lipid
PNPLA8	lipid
POMC	lipid
PON1	lipid
PON2	lipid
PON3	lipid
PPARA	lipid
PPARD	lipid
PPARG	lipid
PPARGC1A	lipid
PPARGC1B	lipid
PPM1L	lipid
PPP1CA	lipid
PPP1CB	lipid
PPP1CC	lipid
PPT1	lipid
PPT2	lipid
PRKAA2	lipid
PRKAB2	lipid
PRKACA	lipid
PRKACB	lipid
PRKACG	lipid
PRKAG2	lipid
PRKD1	lipid
PRKD2	lipid
PRKD3	lipid
PRXL2B	lipid
PSAP	lipid
PTDSS1	lipid
PTDSS2	lipid
PTEN	lipid
PTGDS	lipid
PTGES	lipid
PTGES2	lipid
PTGES3	lipid
PTGIS	lipid
PTGR1	lipid
PTGR2	lipid
PTGS1	lipid
PTGS2	lipid
PTPMT1	lipid
PTPN13	lipid
RAB14	lipid
RAB4A	lipid
RAB5A	lipid
RAN	lipid
RGL1	lipid
RORA	lipid
RUFY1	lipid
RXRA	lipid
RXRB	lipid
SACM1L	lipid
SAMD8	lipid
SAR1B	lipid
SBF1	lipid
SBF2	lipid
SC5D	lipid
SCAP	lipid
SCD	lipid
SCD5	lipid
SCP2	lipid
SEC23A	lipid
SEC24A	lipid
SEC24B	lipid
SEC24C	lipid
SEC24D	lipid
SELENOI	lipid
SERPINA6	lipid
SGMS1	lipid
SGMS2	lipid
SGPL1	lipid
SGPP1	lipid
SGPP2	lipid
SIN3A	lipid
SIN3B	lipid
SLC10A1	lipid
SLC10A2	lipid
SLC22A5	lipid
SLC25A1	lipid
SLC25A17	lipid
SLC25A20	lipid
SLC27A1	lipid
SLC27A2	lipid
SLC27A3	lipid
SLC27A5	lipid
SLC44A1	lipid
SLC44A2	lipid
SLC44A3	lipid
SLC44A4	lipid
SLC44A5	lipid
SLC51A	lipid
SLC51B	lipid
SLCO1A2	lipid
SLCO1B1	lipid
SLCO1B3	lipid
SMARCD3	lipid
SMPD1	lipid
SMPD2	lipid
SMPD3	lipid
SMPD4	lipid
SP1	lipid
SPHK1	lipid
SPHK2	lipid
SPNS2	lipid
SPTLC1	lipid
SPTLC2	lipid
SPTLC3	lipid
SPTSSA	lipid
SPTSSB	lipid
SQLE	lipid
SRD5A1	lipid
SRD5A2	lipid
SRD5A3	lipid
SREBF1	lipid
SREBF2	lipid
STAR	lipid
STARD10	lipid
STARD3	lipid
STARD3NL	lipid
STARD4	lipid
STARD5	lipid
STARD6	lipid
STARD7	lipid
STS	lipid
SULT2A1	lipid
SUMF1	lipid
SUMF2	lipid
SUMO2	lipid
SYNJ1	lipid
SYNJ2	lipid
TAFAZZIN	lipid
TBL1X	lipid
TBL1XR1	lipid
TBXAS1	lipid
TECR	lipid
TECRL	lipid
TGS1	lipid
THEM4	lipid
THEM5	lipid
THRAP3	lipid
THRSP	lipid
TIAM2	lipid
TM7SF2	lipid
TMEM86B	lipid
TNFAIP8	lipid
TNFAIP8L1	lipid
TNFAIP8L2	lipid
TNFAIP8L3	lipid
TNFRSF21	lipid
TPTE	lipid
TPTE2	lipid
TRIB3	lipid
TSPO	lipid
TSPOAP1	lipid
TXNRD1	lipid
UBE2I	lipid
UGCG	lipid
UGT1A9	lipid
UGT8	lipid
VAC14	lipid
VAPA	lipid
VAPB	lipid
VDR	lipid
